# Supplementary material for: Analytical Validation of a New Enzymatic and Automatable Method for d-Xylose Measurement in Human Urine Samples
Source: Hindawi journal article supplement (doi:10.1155/2017/8421418), 2017-01-01
Supplement: f1 [file 8421418.f1.pdf]

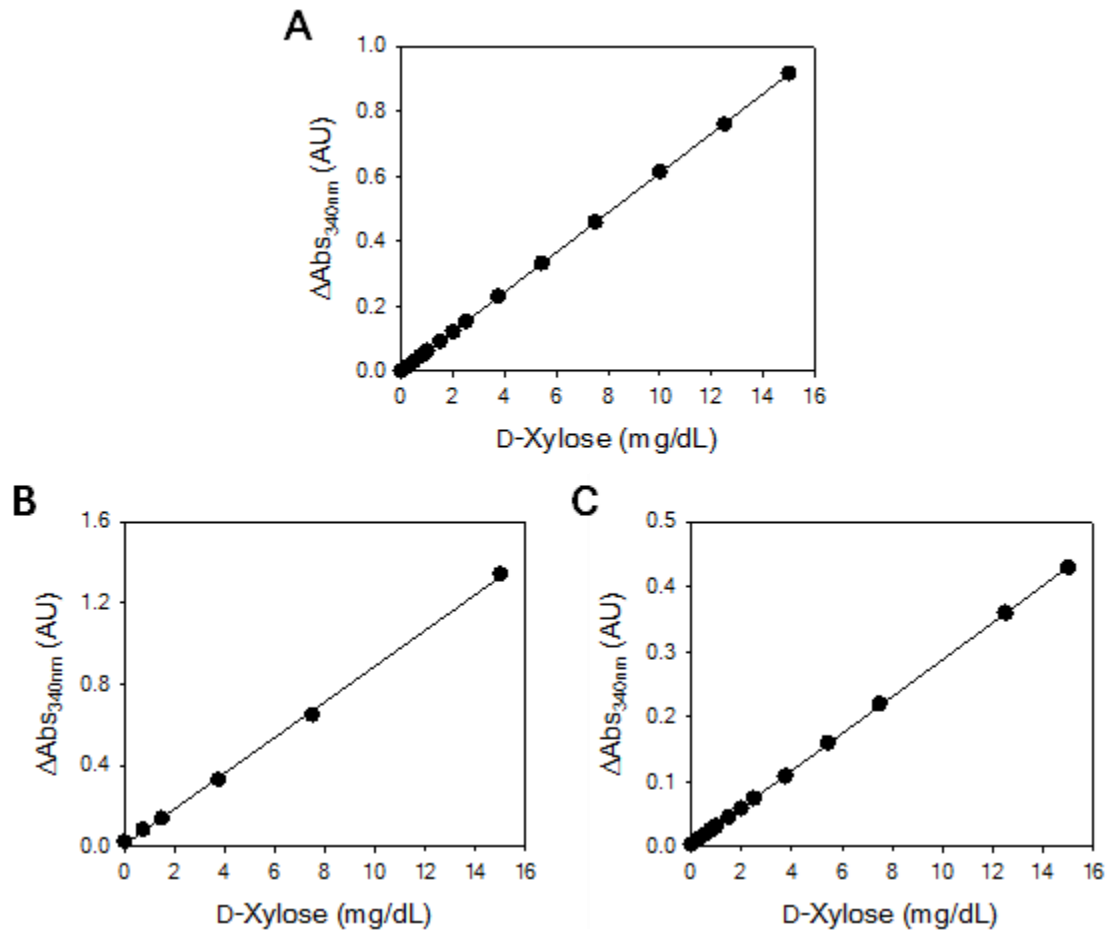

**Supplemental Figure 1. Linearity of the enzymatic D-xylose quantification method.**

Samples with D-xylose concentrations ranging from 0 to 15 mg/dL were assayed in: (A) Roche Cobas c502 analyzer (15 concentrations by triplicate); (B) Werfen ILab 600 analyzer (6 concentrations by triplicate); and (C) Siemens Dimension Vista 1500 device (15 concentrations by duplicate).

Supplemental Table 1. Enzymatic xylose quantification general protocol used in Roche Cobas c502, Werfen ILab 600, and Siemens Dimension Vista 1500 automated analyzers.

| Step                                                                                                                                                                                                                                                                          | Reactive                                           | Blank                              | Calibrator                         | Sample                             |
|-------------------------------------------------------------------------------------------------------------------------------------------------------------------------------------------------------------------------------------------------------------------------------|----------------------------------------------------|------------------------------------|------------------------------------|------------------------------------|
| 1                                                                                                                                                                                                                                                                             | Distilled water                                    | $F_1 \times V_R$ ( $\mu\text{L}$ ) | -                                  | -                                  |
|                                                                                                                                                                                                                                                                               | REACTIVE 1<br>(phosphate buffer + $\text{NAD}^+$ ) | $F_2 \times V_R$ ( $\mu\text{L}$ ) | $F_2 \times V_R$ ( $\mu\text{L}$ ) | $F_2 \times V_R$ ( $\mu\text{L}$ ) |
|                                                                                                                                                                                                                                                                               | Sample (Urine)                                     | -                                  | -                                  | $F_1 \times V_R$ ( $\mu\text{L}$ ) |
|                                                                                                                                                                                                                                                                               | Xylose Calibrator<br>(3.75 mg/dL)                  | -                                  | $F_1 \times V_R$ ( $\mu\text{L}$ ) | -                                  |
| Mix the reaction and incubate for 5 min. After this, read the absorbance (A1)                                                                                                                                                                                                 |                                                    |                                    |                                    |                                    |
| 2                                                                                                                                                                                                                                                                             | REACTIVE 2<br>(Xylose dehydrogenase)               | $F_3 \times V_R$ ( $\mu\text{L}$ ) | $F_3 \times V_R$ ( $\mu\text{L}$ ) | $F_3 \times V_R$ ( $\mu\text{L}$ ) |
| Mix the reaction, incubate for 5 min and read the final absorbance (A2)                                                                                                                                                                                                       |                                                    |                                    |                                    |                                    |
| Calculation method: two end-points.<br>Note: Each time xylose is measured in urine samples, xylose controls must be performed after calibration. These controls, one with low concentration and the second with high concentration, must be measured as if they were samples. |                                                    |                                    |                                    |                                    |

$V_R$ : final volume of the reaction in  $\mu\text{L}$ . It is the addition of the volumes of reactive 1, reactive 2 and distilled water (for the blank), sample or xylose calibrator.

$V_R$  is 200  $\mu\text{L}$  in Roche Cobas c502 and Werfen ILab 600 analyzers, and 145  $\mu\text{L}$  in Siemens Dimension Vista 1500 device.

$F_1$ ,  $F_2$  and  $F_3$  are the dilution ratios of each reagent/sample with respect to the final volume of the reaction ( $F_1 + F_2 + F_3 = 1$ ):  $F_1 = 0.175$ ;  $F_2 = 0.725$ ;  $F_3 = 0.1$ .

**Supplemental Table 2.** Cumulated D-xylose values (expressed in total mg) in patients' samples of urine collected during 5 hours after taking LacTEST 0.45 g. Samples were tested the same day both with the phloroglucinol method and the enzymatic method using Cobas c502 automated analyzer from Roche.

| <b>n</b> | <b>Phloroglucinol<br/>Method<br/>(Total mg)</b> | <b>Cobas c502<br/>Method<br/>(Total mg)</b> | <b>n</b> | <b>Phloroglucinol<br/>Method<br/>(Total mg)</b> | <b>Cobas c502<br/>Method<br/>(Total mg)</b> |
|----------|-------------------------------------------------|---------------------------------------------|----------|-------------------------------------------------|---------------------------------------------|
| 1        | 35.97                                           | 16.88                                       | 43       | 57.26                                           | 39.38                                       |
| 2        | 50.92                                           | 34.45                                       | 44       | 56.72                                           | 52.36                                       |
| 3        | 49.95                                           | 32.15                                       | 45       | 44.74                                           | 36.80                                       |
| 4        | 25.44                                           | 10.56                                       | 46       | 40.21                                           | 23.18                                       |
| 5        | 27.43                                           | 12.70                                       | 47       | 67.13                                           | 30.56                                       |
| 6        | 35.74                                           | 23.28                                       | 48       | 26.93                                           | 13.07                                       |
| 7        | 45.63                                           | 30.18                                       | 49       | 74.43                                           | 58.84                                       |
| 8        | 24.14                                           | 20.65                                       | 50       | 49.12                                           | 37.53                                       |
| 9        | 59.91                                           | 57.60                                       | 51       | 41.59                                           | 21.29                                       |
| 10       | 58.94                                           | 47.07                                       | 52       | 40.50                                           | 25.19                                       |
| 11       | 19.91                                           | 2.83                                        | 53       | 20.48                                           | 16.63                                       |
| 12       | 20.89                                           | 11.58                                       | 54       | 51.32                                           | 32.77                                       |
| 13       | 18.21                                           | 8.89                                        | 55       | 35.06                                           | 17.33                                       |
| 14       | 14.29                                           | 6.56                                        | 56       | 38.55                                           | 19.18                                       |
| 15       | 21.73                                           | 10.75                                       | 57       | 39.98                                           | 20.69                                       |
| 16       | 25.06                                           | 11.33                                       | 58       | 36.03                                           | 14.27                                       |
| 17       | 22.49                                           | 11.01                                       | 59       | 46.04                                           | 28.86                                       |
| 18       | 25.11                                           | 12.08                                       | 60       | 49.91                                           | 26.40                                       |
| 19       | 19.07                                           | 6.16                                        | 61       | 30.55                                           | 13.52                                       |
| 20       | 38.56                                           | 20.30                                       | 62       | 54.08                                           | 15.75                                       |
| 21       | 71.66                                           | 52.95                                       | 63       | 41.12                                           | 26.22                                       |
| 22       | 7.93                                            | 4.99                                        | 64       | 69.34                                           | 46.85                                       |
| 23       | 22.64                                           | 6.41                                        | 65       | 28.11                                           | 12.68                                       |
| 24       | 20.20                                           | 11.41                                       | 66       | 39.01                                           | 19.91                                       |
| 25       | 31.92                                           | 17.96                                       | 67       | 71.11                                           | 33.35                                       |
| 26       | 18.31                                           | 8.07                                        | 68       | 37.34                                           | 13.84                                       |
| 27       | 29.58                                           | 12.89                                       | 69       | 25.32                                           | 14.39                                       |
| 28       | 56.37                                           | 37.87                                       | 70       | 23.43                                           | 9.08                                        |
| 29       | 88.45                                           | 68.90                                       | 71       | 25.14                                           | 5.33                                        |
| 30       | 65.86                                           | 50.14                                       | 72       | 51.29                                           | 35.56                                       |
| 31       | 24.04                                           | 16.00                                       | 73       | 58.45                                           | 33.25                                       |
| 32       | 40.65                                           | 29.73                                       | 74       | 57.46                                           | 35.78                                       |
| 33       | 24.81                                           | 6.66                                        | 75       | 16.82                                           | 4.01                                        |
| 34       | 44.71                                           | 19.71                                       | 76       | 42.82                                           | 29.26                                       |
| 35       | 8.02                                            | 2.23                                        | 77       | 51.10                                           | 37.23                                       |
| 36       | 30.19                                           | 14.87                                       | 78       | 45.12                                           | 30.06                                       |
| 37       | 50.13                                           | 25.92                                       | 79       | 15.83                                           | 4.04                                        |
| 38       | 15.21                                           | 7.72                                        | 80       | 32.90                                           | 13.99                                       |
| 39       | 54.30                                           | 34.20                                       | 81       | 43.93                                           | 32.12                                       |
| 40       | 39.14                                           | 19.99                                       | 82       | 18.38                                           | 8.03                                        |
| 41       | 41.85                                           | 29.20                                       | 83       | 22.38                                           | 8.47                                        |
| 42       | 22.67                                           | 4.60                                        | 84       | 38.67                                           | 20.76                                       |

**Supplemental Table 2.** (continued)

|          | <b>Phloroglucinol<br/>Method</b> | <b>Cobas c502<br/>Method</b> |          | <b>Phloroglucinol<br/>Method</b> | <b>Cobas c502<br/>Method</b> |
|----------|----------------------------------|------------------------------|----------|----------------------------------|------------------------------|
| <b>n</b> | <b>Total mg</b>                  | <b>Total mg</b>              | <b>n</b> | <b>Total mg</b>                  | <b>Total mg</b>              |
| 85       | 35.14                            | 16.88                        | 133      | 16.51                            | 5.50                         |
| 86       | 27.62                            | 7.11                         | 134      | 25.48                            | 11.22                        |
| 87       | 58.15                            | 39.28                        | 135      | 72.55                            | 42.00                        |
| 88       | 52.00                            | 39.55                        | 136      | 18.64                            | 6.94                         |
| 89       | 38.57                            | 19.96                        | 137      | 44.07                            | 26.87                        |
| 90       | 56.72                            | 45.39                        | 138      | 56.04                            | 33.63                        |
| 91       | 51.56                            | 20.94                        | 139      | 60.36                            | 42.12                        |
| 92       | 60.14                            | 52.05                        | 140      | 45.58                            | 35.75                        |
| 93       | 50.16                            | 31.52                        | 141      | 71.26                            | 47.04                        |
| 94       | 51.91                            | 47.03                        | 142      | 43.66                            | 30.23                        |
| 95       | 52.78                            | 35.63                        | 143      | 31.14                            | 7.56                         |
| 96       | 40.22                            | 24.68                        | 144      | 61.94                            | 59.30                        |
| 97       | 54.51                            | 44.82                        | 145      | 35.68                            | 22.85                        |
| 98       | 63.01                            | 50.90                        | 146      | 86.70                            | 66.90                        |
| 99       | 33.64                            | 17.54                        | 147      | 31.79                            | 10.56                        |
| 100      | 72.72                            | 48.78                        | 148      | 42.61                            | 19.55                        |
| 101      | 81.17                            | 66.45                        | 149      | 71.54                            | 54.70                        |
| 102      | 72.52                            | 49.70                        | 150      | 33.32                            | 18.15                        |
| 103      | 44.57                            | 25.32                        | 151      | 26.31                            | 18.30                        |
| 104      | 44.33                            | 23.29                        | 152      | 70.71                            | 62.21                        |
| 105      | 50.28                            | 39.66                        | 153      | 55.75                            | 45.23                        |
| 106      | 38.18                            | 19.20                        | 154      | 64.61                            | 47.18                        |
| 107      | 85.28                            | 69.09                        | 155      | 31.82                            | 12.22                        |
| 108      | 50.83                            | 27.20                        | 156      | 35.54                            | 9.28                         |
| 109      | 61.70                            | 46.23                        | 157      | 50.03                            | 40.66                        |
| 110      | 47.21                            | 25.19                        | 158      | 34.46                            | 18.53                        |
| 111      | 44.18                            | 22.52                        | 159      | 28.38                            | 7.18                         |
| 112      | 54.67                            | 45.79                        | 160      | 54.02                            | 38.78                        |
| 113      | 47.78                            | 38.29                        | 161      | 73.54                            | 59.71                        |
| 114      | 29.33                            | 15.27                        | 162      | 18.92                            | 10.20                        |
| 115      | 45.44                            | 40.80                        | 163      | 40.74                            | 24.57                        |
| 116      | 13.99                            | 10.44                        | 164      | 26.90                            | 14.31                        |
| 117      | 22.43                            | 6.29                         | 165      | 17.72                            | 7.16                         |
| 118      | 28.10                            | 15.98                        | 166      | 20.34                            | 16.75                        |
| 119      | 49.71                            | 33.71                        | 167      | 28.29                            | 17.36                        |
| 120      | 97.60                            | 59.02                        | 168      | 63.03                            | 36.98                        |
| 121      | 43.37                            | 28.85                        | 169      | 69.23                            | 46.53                        |
| 122      | 21.59                            | 6.73                         | 170      | 21.46                            | 8.01                         |
| 123      | 44.08                            | 22.79                        | 171      | 29.46                            | 13.82                        |
| 124      | 33.75                            | 15.09                        | 172      | 39.12                            | 26.64                        |
| 125      | 36.08                            | 23.40                        | 173      | 34.85                            | 28.43                        |
| 126      | 22.55                            | 13.13                        | 174      | 14.69                            | 10.44                        |
| 127      | 62.05                            | 42.04                        | 175      | 70.94                            | 51.19                        |
| 128      | 72.19                            | 28.41                        | 176      | 54.99                            | 45.64                        |
| 129      | 53.31                            | 32.40                        | 177      | 16.61                            | 7.45                         |
| 130      | 52.39                            | 34.98                        | 178      | 21.47                            | 3.03                         |
| 131      | 32.12                            | 5.18                         | 179      | 62.74                            | 58.13                        |
| 132      | 52.86                            | 34.55                        | 180      | 77.76                            | 56.64                        |

**Supplemental Table 2.** (continued)

| <b>n</b> | <b>Phloroglucinol<br/>Method<br/>Total mg</b> | <b>Cobas c502<br/>Method<br/>Total mg</b> | <b>n</b> | <b>Phloroglucinol<br/>Method<br/>Total mg</b> | <b>Cobas c502<br/>Method<br/>Total mg</b> |
|----------|-----------------------------------------------|-------------------------------------------|----------|-----------------------------------------------|-------------------------------------------|
| 181      | 42.85                                         | 26.36                                     | 203      | 49.86                                         | 39.94                                     |
| 182      | 27.30                                         | 14.92                                     | 204      | 24.48                                         | 10.30                                     |
| 183      | 44.95                                         | 31.66                                     | 205      | 61.16                                         | 39.71                                     |
| 184      | 81.83                                         | 64.05                                     | 206      | 17.97                                         | 5.61                                      |
| 185      | 25.07                                         | 13.07                                     | 207      | 29.25                                         | 23.75                                     |
| 186      | 41.45                                         | 23.24                                     | 208      | 37.09                                         | 16.94                                     |
| 187      | 61.27                                         | 51.32                                     | 209      | 40.95                                         | 22.10                                     |
| 188      | 89.00                                         | 37.77                                     | 210      | 27.42                                         | 12.94                                     |
| 189      | 72.66                                         | 39.55                                     | 211      | 54.10                                         | 25.68                                     |
| 190      | 20.24                                         | 3.88                                      | 212      | 48.37                                         | 39.33                                     |
| 191      | 25.40                                         | 14.91                                     | 213      | 101.04                                        | 85.68                                     |
| 192      | 8.75                                          | 0.28                                      | 214      | 38.96                                         | 23.54                                     |
| 193      | 58.41                                         | 44.80                                     | 215      | 70.54                                         | 50.58                                     |
| 194      | 91.24                                         | 72.25                                     | 216      | 92.41                                         | 68.96                                     |
| 195      | 57.06                                         | 38.36                                     | 217      | 60.29                                         | 40.95                                     |
| 196      | 28.83                                         | 10.84                                     | 218      | 40.76                                         | 26.58                                     |
| 197      | 66.53                                         | 55.06                                     | 219      | 66.52                                         | 55.50                                     |
| 198      | 73.53                                         | 53.02                                     | 220      | 70.92                                         | 60.90                                     |
| 199      | 23.64                                         | 10.56                                     | 221      | 41.16                                         | 23.53                                     |
| 200      | 59.84                                         | 48.86                                     | 222      | 26.66                                         | 14.64                                     |
| 201      | 25.26                                         | 17.24                                     | 223      | 56.83                                         | 32.25                                     |
| 202      | 63.77                                         | 48.55                                     | 224      | 22.95                                         | 9.35                                      |
